# Supplementary material for: The common transcriptional subnetworks of the grape berry skin in the late stages of ripening
Source: PubMed Central journal article supplement (PMC5450095; doi:10.1186/s12870-017-1043-1), 2017-05-30

### Histogram of Data

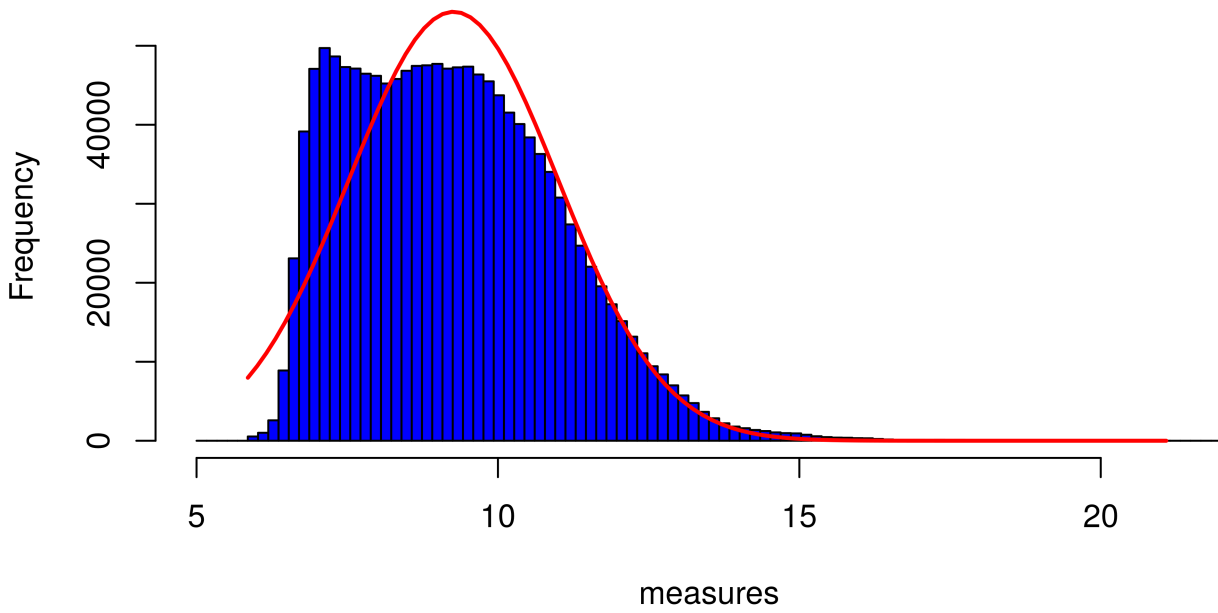

### Normal Q-Q Plot

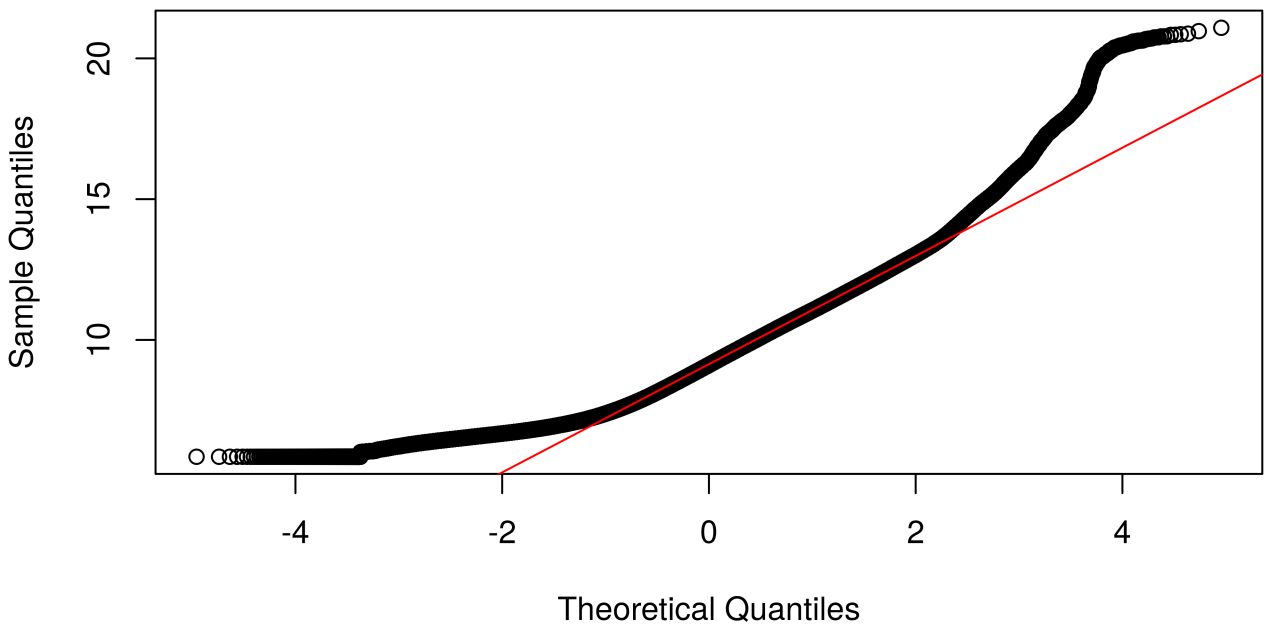

Supplement: 12870_2017_1043_MOESM16_ESM.pdf [file 12870_2017_1043_MOESM16_ESM.pdf]
